# Supplementary material for: Target-initiated impedimetric proximity ligation assay with DNAzyme design for in situ amplified biocatalytic precipitation
Source: Royal Society of Chemistry journal article supplement (doi:10.1039/c4an00523f), 2014-01-01
Supplement: c4an00523f1.pdf [file c4an00523f1.pdf]

## Electronic Supplementary Information

### Target-initiated impedimetric proximity ligation assay with DNAzyme design for *in situ* amplified biocatalytic precipitation

Juan Tang,<sup>a,c</sup> Minghua Lu,<sup>\*,b</sup> and Dianping Tang<sup>\*a,c</sup>

<sup>a</sup>*Chongqing Key Laboratory of Environmental Materials & Remediation Technologies, College of Materials and Chemical Engineering, Chongqing University of Arts and Sciences, Chongqing 402160, PR China*

<sup>b</sup>*Institute of Environmental and Analytical Science, School of Chemistry and Chemical Engineering, Henan University, Kaifeng 475004, Henan, P.R. China*

<sup>c</sup>*Institute of Analytical Chemistry, Department of Chemistry, Fuzhou University, Fuzhou 350108, PR China*

E-mail: [dianping.tang@fzu.edu.cn](mailto:dianping.tang@fzu.edu.cn) (D. Tang)

Fax: +86 591 2286 6125; Tel.: +86 591 2286 6125.

## EXPERIMENTAL SECTION

**Materials.** Two used single-stranded DNAs ( $S_1$ : 5'-SH-AAA AAT CTC TGT GGA GGG-3',  $S_2$ : 5'-GGG CAG GGG ACA CA-3') were obtained from Sangon Biotechn. Co., Ltd (Shanghai, China). Hemin was purchased from Tokyo Chem. Inc. (Japan). 4-chloro-1-naphthol (4-CN) and 30%  $H_2O_2$  were purchased from Sinopharm Chem. Re. Co. (Shanghai, China). All the other chemicals were of analytical grade and used without further purification. Ultrapure water obtained from a Millipore water purification system ( $\geq 18 M\Omega$ , Milli-Q, Millipore) was used in all runs. Before use, DNA stock solution was obtained by dissolving oligonucleotides in 0.01 M phosphate-buffered saline (PBS, pH 7.4) solution. Each oligonucleotide was heated to 90 °C for 5 min, and slowly cooled down to room temperature before use. Then, the oligonucleotides were diluted with required concentration with HEPES-NaOH buffer (25 mM HEPES-NaOH, pH 7.8, 30 mM  $KNO_3$ , 500 mM  $NaNO_3$ , 0.5 g/L Triton X-100). The stock solution of hemin (5 mM) was prepared in DMSO, stored in the dark at -20 °C, and diluted to the desirable concentration with the 40 KT buffer (pH 6.2, 100 mM Tris, 50 mM MES, 40 mM KCl, 0.05% Triton X-100, 1% (v/v) DMSO).

**Fabrication of Impedimetric Sensor.** A gold electrode (3 mm in diameter) was polished repeatedly with 0.3  $\mu m$  and 0.05  $\mu m$  alumina slurry, followed by successive sonication in acetone, ethanol and deionized water for 5 min and dried in air. Before modification, the gold electrode was cleaned with hot piranha solution (a 3:1 mixture of  $H_2SO_4$  and  $H_2O_2$ , *Cautions!*) for 10 min, and then continuously scanned within the potential range of -0.3 to 1.5 V in freshly prepared deoxygenated 0.5 M  $H_2SO_4$  until a voltammogram characteristic of the clean gold electrode was established. After the pretreatment, the freshly cleaned gold electrode was immediately immersed in the stock solution of 3.0- $\mu L$   $S_1$  oligonucleotide solution (1.0  $\mu M$ ). During this process,  $S_1$  oligonucleotide was immobilized on the gold electrode *via* the Au-S bond. After rinsing with distilled water, the modified gold electrode was incubated with 1.0 mM 6-mercaptohexanol in 10 mM Tris-HCl buffer, pH 7.4, for 60 min. Finally, the as-prepared DNA sensor was suspended

over pH 7.4 PBS at 4 °C for further use.

**Measurement Procedure.** All electrochemical measurements were carried out with  $\mu$ Autolab III electrochemical analysis system (Metrohm, Switzerland) with a conventional three-electrode system using a modified gold electrode as working electrode, a platinum wire as auxiliary electrode, and a saturated calomel electrode (SCE) as reference electrode. Before measurement, an incubation solution containing 10  $\mu$ L target  $\text{Ag}^+$  standards with various concentrations and 10  $\mu$ L  $\text{S}_2$  oligonucleotide (2  $\mu$ M) was prepared. To detect target silver ions, the as-prepared DNA sensor was immersed into the incubation solution for 1 h at 37 °C. During this process,  $\text{S}_2$  oligonucleotide was grafted on the surface of the electrode by hybridizing with  $\text{S}_1$  oligonucleotide to form quadruplex/duplex DNA structure, and target  $\text{Ag}^+$  ions were intercalated between C bases through C- $\text{Ag}^+$ -C coordination chemistry. Following that, the electrode was immersed in a solution containing 25  $\mu$ M hemin for 30 min. Afterwards, the resulting electrode was dipped in the precipitation solution containing 1.0 mM 4-CN and 0.15 mM  $\text{H}_2\text{O}_2$ , and incubation for 10 min at room temperature. Finally, the impedimetric characteristic of the resulting electrode was measured in 0.01 M pH 7.4 PBS containing 2.0 mM  $\text{Fe}(\text{CN})_6^{4-/3-}$  and 0.1 M KCl. Impedimetric measurement was monitored at frequency  $10^2$  -  $10^6$  Hz at the formed potential of 220 mV, using alternating voltage of 10 mV. A Nyquist plot ( $Z_{\text{re}}$  vs.  $Z_{\text{im}}$ ) was drawn to analyze the impedance results. All calibration plots were calculated relative to zero analyte. Analyses are always made in triplicate.

**Assay Principle of Impedimetric Sensor.** The strategy of on-line enzymatic biocatalytic precipitation (BCP) for  $\text{Ag}^+$  detection is illustrated in Fig. 1. One split part of hemin/G-quadruplex-based DNAzyme is initially immobilized on the gold electrode through the thiol-Au affinity, and then treated with 6-mercaptohexanol to block the non-specific sites on the surface. When the sensing interface is incubated with incubation solution containing target  $\text{Ag}^+$  and another split parts, two split parts containing probe  $\text{S}_1$  and probe  $\text{S}_2$  can easily assemble to form the G-quadruplex. Meanwhile, target silver ions can intercalate into the C bases of the appended

duplex on the 5' terminals of the G-quadruplex. The formation C-Ag<sup>+</sup>-C base pairs can strengthen the G-quadruplex and thus promote the binding of G-quadruplex to hemin. The incorporation of hemin into the hemin/G-quadruplex-based DNAzyme is catalytically active in accelerating oxidation of 4-CN by H<sub>2</sub>O<sub>2</sub> to yield the insoluble and insulating product benzo-4-chlorohexadienone on the transducer surface. Thus, the resistance of the sensor dramatically increased. Conversely, in the absence of Ag<sup>+</sup>, the G-quadruplex structure is unstable and without the ability to bind hemin, thus exhibiting no catalytic activity in the precipitation of insoluble products. By monitoring the change in the resistance, we can indirectly determine the concentration of target Ag<sup>+</sup> in the sample.

**Optimization of Experimental Conditions.** To acquire an optimal analytical performance, some experimental conditions, such as hybridization time for target-induced proximity ligation assay and deposition time of 4-CN for the BCP, should be investigated. In this work, the signal amplification of the impedimetric sensor mainly derived from the biocatalytic precipitation through the formed split DNAzyme. So, the hybridization time of S<sub>1</sub> oligonucleotides interaction with S<sub>2</sub> oligonucleotides and silver ions should be firstly optimized. During this process, 10 nM Ag<sup>+</sup> was used as an example. As shown in Fig. S1-a, the electron-transfer resistances increased with the increasing hybridization time, and tend to level off after 60 min. Hence, 60 min was used for S<sub>1</sub> hybridization with the complementary strand and target analyte.

The biocatalytic precipitation process is also very crucial to achieve the optimal performance. After the hemin/G-quadruplex-based DNAzyme was formed on the gold electrode, the sensor was incubated with 4-CN in the presence of H<sub>2</sub>O<sub>2</sub> for different times at 37 °C (10 nM Ag<sup>+</sup> was used as an example). As seen from Fig. S1-b, the optimal impedimetric response was obtained after 10 min, and longer deposition times did not cause the significant change in the resistance. To save the time, 10 min was selected as the deposition time for the development of BCP.

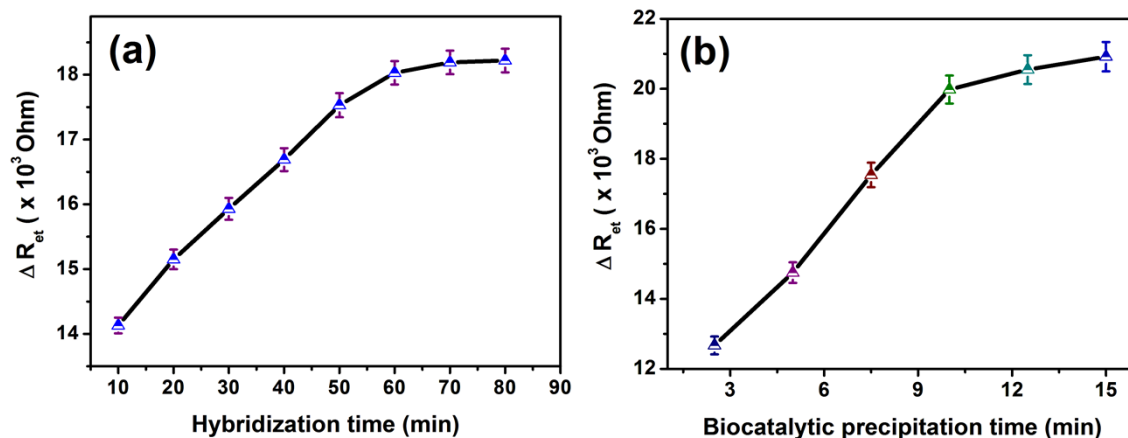

**Fig. S1** The effect of (a) hybridization time of target-initiated proximity ligation assay and (b) biocatalytic precipitation time on the impedimetric signal of the developed assay protocol by using 10 nM  $\text{Ag}^+$  as an example.

**Table S1** Comparison of analytical properties of PLA-based impedimetric sensor with other  $\text{Ag}^+$  assay methods.

| Method                                                           | Linear range (nM) | LOD (nM) | Ref.      |
|------------------------------------------------------------------|-------------------|----------|-----------|
| Fluorogenic and chromogenic probe based sensor                   | 100 – 5000        | 130      | S1        |
| Surface plasmon resonance sensor                                 | 50 - 2000         | 10       | S2        |
| Carbon-nanotube-based fluorescent sensor                         | 0-150             | 1        | S3        |
| DNAzyme-based colorimetric assay                                 | 50-3000           | 64       | S4        |
| Tween 20-stabilized gold nanoparticles-based colorimetric assay  | 400-1000          | -        | S5        |
| Impedimetric sensor                                              | 100-800           | 10       | S6        |
| Solid-contact potentiometric polymer microelectrodes based assay | 1-10000           | -        | S7        |
| Potentiometric sensor                                            | -                 | 1        | S8        |
| Peptide-coated CdS quantum dots based optical assay              | -                 | ~500     | S9        |
| PLA-based amplified strategy                                     | 0.1-25            | 0.08     | This work |

## Notes and references

- S1. A. Chatterjee, M. Santra, N. Won, S. Kim, K. Kim, S. Kim and K. Ahh, *J. Am. Chem. Soc.*, 2009, **131**, 2040-2041.
- S2. C. Chang, S. Lin, S. Wei, Y. Su and C. Lin, *Anal. Bioanal. Chem.*, 2012, **402**, 2827-2835.
- S3. C. Zhao, K. Qu, Y. Song, C. Xu, J. Ren and X. Qu, *Chem. Eur. J.*, 2010, **16**, 8147-8154.
- S4. X. Zhou, D. Kong and H. Shen, *Anal. Chem.*, 2010, **82**, 789-793.
- S5. C. Lin, C. Yu, Y. Lin and W. Tseng, *Anal. Chem.*, 2010, **82**, 6830-6837.
- S6. Z. Lin, X. Li and H. Kraatz, *Anal. Chem.*, 2011, **83**, 6896-6901.
- S7. N. Rubinova, K. Torres and E. Bakker, *Sens. Actu. B*, 2007, **121**, 135-141.
- S8. A. Ceresa, A. Radu, S. Peper, E. Bakker and E. Pretsch, *Anal. Chem.*, 2002, **74**, 4027-4036.
- S9. K. Gattas-Asfura and R. Leblanc, *Chem. Commun.*, 2003, **46**, 2684-2685.
